# Supplementary material
Source: PubMed Central journal article supplement (PMC5587159)
Supplement: NIHMS893575-supplement-s1.pdf [file NIHMS893575-supplement-s1.pdf]

**Table S1. Characteristics of patient-derived high-grade glioma cell cultures, Related to Figures 2 and 4.**

| Culture ID    | Tumor type, location and grade                              | Age at diagnosis (years) | Sex | Histone-3 mutational status | Other genomic characteristics                                                | Timepoint tissue obtained    | Prior therapy                                        | Survival (months) |
|---------------|-------------------------------------------------------------|--------------------------|-----|-----------------------------|------------------------------------------------------------------------------|------------------------------|------------------------------------------------------|-------------------|
| SU-DIPG-IV    | DIPG; pons; WHO grade III                                   | 2                        | F   | H3.1K27M                    | <i>P53</i> WT; <i>MDM4</i> amplified; <i>ACVR1</i> G328V                     | Early postmortem autopsy     | XRT; cetuximab; irinotecan                           | 8                 |
| SU-DIPG-VI    | DIPG; pons; WHO grade III                                   | 7                        | F   | H3.3K27M                    | <i>P53</i> mutated                                                           | Early postmortem autopsy     | XRT; vorinostat                                      | 6                 |
| SU-DIPG-XIII  | DIPG; pons; WHO grade IV                                    | 6                        | F   | H3.3K27M                    | N/A                                                                          | Early postmortem autopsy     | XRT                                                  | 4                 |
| SU-DIPG-XXVII | DIPG; pons; WHO grade IV                                    | 8                        | M   | H3.3K27M                    | N/A                                                                          | Early postmortem autopsy     | XRT + avastin; panobinostat; everolimus              | 13                |
| SU-DIPG-XIX   | DIPG; pons; WHO grade IV                                    | 2                        | M   | H3.3K27M                    | N/A                                                                          | Early postmortem autopsy     | XRT; cabazataxal                                     | 18                |
| SU-DIPG-XXI   | DIPG; pons; WHO grade IV                                    | 7                        | M   | H3.1K27M                    | N/A                                                                          | Early postmortem autopsy     | XRT + MK1775                                         | 18                |
| SU-DIPG-XXIV  | DIPG; pons; WHO grade IV                                    | 6                        | F   | H3.3K27M                    | N/A                                                                          | Early postmortem autopsy     | XRT; avastin                                         | 8                 |
| SU-DIPG-XXV   | DIPG; pons; WHO grade IV                                    | 4                        | F   | H3.3K27M                    | N/A                                                                          | Early postmortem autopsy     | XRT                                                  | 11                |
| SU-DIPG-XXVII | DIPG; pons; WHO grade IV                                    | 5                        | M   | H3.3K27M                    | N/A                                                                          | Early postmortem autopsy     | XRT; ABT888                                          | 6                 |
| SU-DIPG-XXIX  | DIPG; pons; WHO grade IV                                    | 6                        | F   | H3.3K27M                    | N/A                                                                          | Early postmortem autopsy     | XRT; panobinostat; avastin; THC oil                  | 12                |
| SU-pSCG-1     | Pediatric spinal cord glioma; spinal cord; WHO grade IV     | 12                       | M   | H3K27M                      | N/A                                                                          | Early postmortem autopsy     | XRT; thioguanine; procarbazine; CCNU; IV vincristine | 11                |
| SU-pGBM3      | Disseminated glioblastoma; left frontal lobe; WHO grade IV  | 20                       | M   | N/A                         | <i>IDH-1</i> WT; <i>P53</i> mutated                                          | Early postmortem autopsy     | XRT; temozolomide; avastin                           | 9                 |
| SU-pcGBM2     | Pediatric cortical glioblastoma; frontal lobe; WHO grade IV | 15                       | M   | WT                          | <i>P53</i> mutated; <i>EGFR</i> amplified; <i>PTEN</i> WT                    | Biopsy at diagnosis          | none                                                 | N/A               |
| SU-GBM034     | Glioblastoma; temporal lobe; WHO grade IV                   | 70                       | M   | N/A                         | <i>IDH-1</i> WT; <i>PTEN</i> mutated                                         | Biopsy at diagnosis          | none                                                 | N/A               |
| SU-GBM035     | Glioblastoma; temporal lobe; WHO grade IV                   | 61                       | M   | N/A                         | <i>IDH-1</i> WT                                                              | Biopsy at recurrence         | XRT; TMZ                                             | N/A               |
| SU-GBM047     | Epithelioid glioblastoma; temporal lobe; WHO grade IV       | 26                       | M   | N/A                         | <i>BRAF</i> <sup>V600E</sup> ; <i>P53</i> WT; <i>EGFR</i> WT; <i>PTEN</i> WT | Second resection             | Prior resection, no other therapy                    | <2                |
| SU-GBM081     | Glioblastoma; temporal lobe; WHO grade IV                   | 72                       | M   | N/A                         | <i>IDH-1</i> WT; <i>P53</i> mutated                                          | Biopsy at diagnosis          | none                                                 | N/A               |
| SU-O1         | Oligodendroglioma; WHO grade II                             | 19                       | M   | N/A                         | 1p/19q deletion                                                              | Biopsy at diagnosis          | none                                                 | N/A               |
| SU-AO2        | Anaplastic oligodendroglioma; frontal lobe; WHO grade III   | 36 (44 at recurrence)    | M   | N/A                         | 1p/19q deletion; <i>IDH-1</i> mutated                                        | Biopsy at time of recurrence | TMZ                                                  | N/A               |

**Short tandem repeat DNA fingerprinting of HGG cell cultures:**

| STR Fingerprint | AMEL | CSF1P01 | D13S317 | D16S539 | D21S11  | D5S818 | D7S820 | TH01    | TPOX | vWA   |
|-----------------|------|---------|---------|---------|---------|--------|--------|---------|------|-------|
| SU-DIPG-IV      | X/X  | 9/10    | 7/12    | 9/12    | 29/31   | 12/13  | 10/11  | 6/9.3   | 8/   | 15/19 |
| SU-DIPG-VI      | X/X  | 9/10    | 11/11   | 8/13    | 29/31   | 10/12  | 8/9    | 7/8     | 8/11 | 17/18 |
| SU-DIPG-XIII    | X/X  | 9/10    | 11/12   | 11/12   | 30/OL   | 12/12  | 9/9    | 6/7     | OL/8 | 13/18 |
| SU-DIPG-XVII    | X/Y  | 13/13   | 9/9     | 9/12    | 28/29   | 11/11  | 8/9    | 7/7     | 8/11 | 18/19 |
| SU-DIPG-XIX     | X/Y  | 10/11   | 13/14   | 9/13    | 30/30   | 11/12  | 10/10  | 9.3/9.3 | 8/11 | 17/18 |
| SU-DIPG-XXI     | X/Y  | 11/12   | 8/13    | 10/10   | 30/32   | 10/11  | 8/9    | 6/6     | 8/12 | 16/19 |
| SU-DIPG-XXIV    | X/X  | 10/12   | 11/11   | 11/13   | 30/31   | 11/11  | 8/10   | 6/9.3   | 8/11 | 17/19 |
| SU-DIPG-XXV     | X/X  | 12/12   | 8/11    | 12/13   | 30/35   | 11/13  | 10/12  | 9/9     | 7/8  | 14/18 |
| SU-DIPG-XXVII   | X/Y  | 11/12   | 9/12    | 10/12   | 30/33.2 | 11/11  | 9/12   | 6/6     | 8/11 | 16/17 |
| SU-DIPG-XXIX    | X/X  | 10/11   | 11/12   | 11/11   | 28/32.2 | 12/14  | 8/11   | 6/9.3   | 8/11 | 15/19 |
| SU-pSCG-1       | X/Y  | 10/12   | 12/     | 11/12   | 28/29   | 11/12  | 10/    | 9.3/    | 8/11 | 16/18 |
| SU-pGBM3        | X/Y  | 12/12   | 8/15,16 | 9/14    | 30/31   | 9/11   | 8/10   | 9/9.3   | 8/9  | 14/17 |
| SU-pcGBM2       | X/Y  | 10/11   | 11/     | 9/11    | 28/30.2 | 11/    | 11/12  | 9.3/    | 8/12 | 17/18 |
| SU-GBM034       | X/Y  | 10/12   | 8/8     | 10/12   | 29/30   | 11/13  | 8/1    | 7/7     | 8/11 | 18/18 |
| SU-GBM035       | X/Y  | 10/11   | 12/     | 12/13   | 30/     | 11/13  | 10/    | 7/9.3   | 9/12 | 18/20 |
| SU-GBM047       | X/Y  | 12/12   | 8/8     | 11/12   | 29/31   | 12/12  | 9/11   | 6/9.3   | 8/11 | 19/19 |
| SU-GBM081       | X/Y  | 10/11   | 11/11   | 9/9     | 28/31.2 | 9/12   | 8/13   | 9/9.3   | 8/8  | 16/17 |
| SU-O1           | X/Y  | 10/12   | 11/11   | 12/13   | 30/30   | 12/13  | 8/11   | 8/9.3   | 8/11 | 14/14 |
| SU-AO2          | X/Y  | 11/13   | 8/12    | 8/11    | 30/33.2 | 11/12  | 8/10   | 9/9     | 8/11 | 16/18 |

**Table S1. Characteristics of patient-derived high-grade glioma cell cultures, Related to Figures 2 and 4.** WHO = World Health Organization; DIPG = diffuse intrinsic pontine glioma; XRT = radiotherapy; TMZ = temozolomide; STR = short tandem repeat.
